# Supplementary material
Source: publisher figshare collection journal article supplement (https://tandf.figshare.com/ndownloader/files/15338966)
Supplement: Supplementary file 1 [file 15338966]

## Filter Media and Ameliorant Details

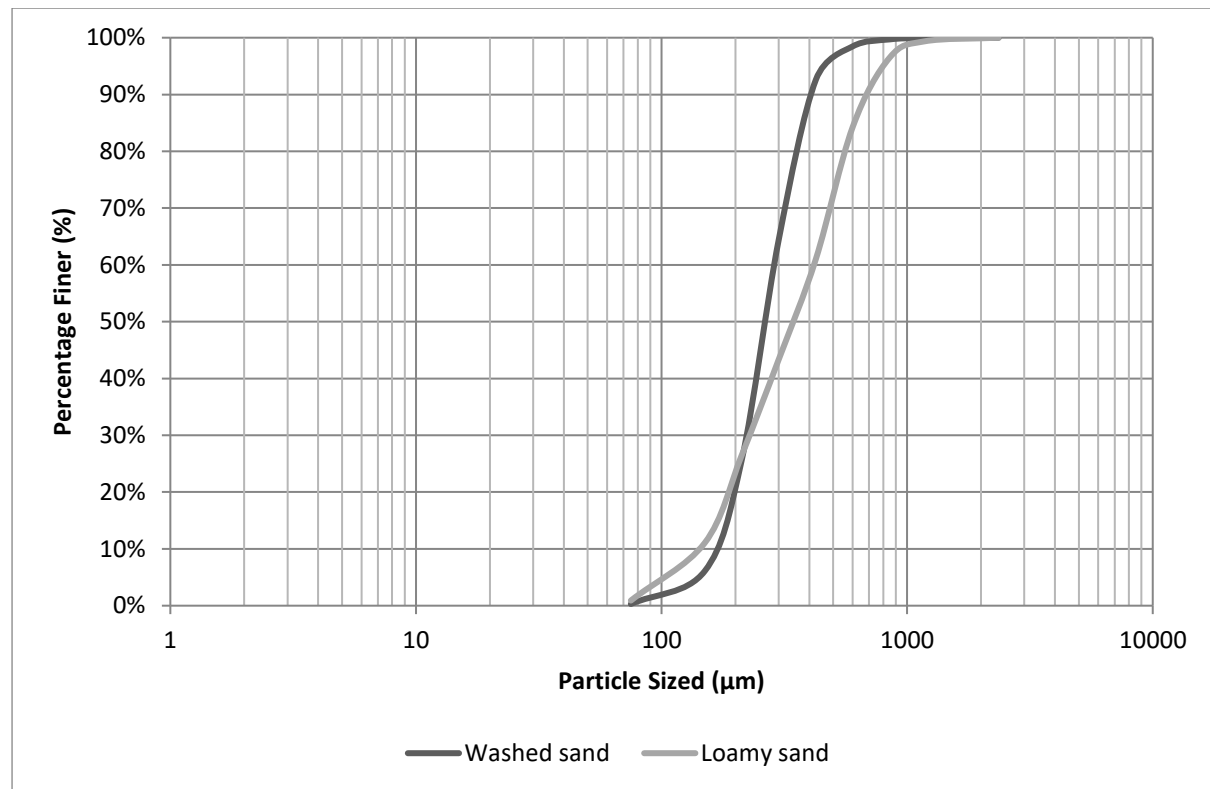

**Figure S.1:** Particle size distribution of two filter media types tested

**Table S.1:** Filter media composition

| Soil property                    | Filter media |            |
|----------------------------------|--------------|------------|
|                                  | Washed sand  | Loamy sand |
| pH                               | 6.33         | 6.33       |
| TOC %                            | <0.10        | 0.25       |
| TOM % (as ashed free dried mass) | 0.11         | 0.47       |
| TP (mg/g)                        | <0.01        | 0.01       |
| TN (mg/g)                        | 0.03         | 0.11       |

The top 100 mm of the filter media layer in each column was mixed with 37 g of ameliorant made as per the recipe shown in Table S.2.

9 **Table S.2:** Ameliorant Mixture (Adopted from Bratieres et al. (2010))

| Name                            | Quantity                          |
|---------------------------------|-----------------------------------|
|                                 | Kg/100 m <sup>2</sup> filter area |
| Granulated poultry manure fines | 50                                |
| Superphosphate                  | 2                                 |
| Magnesium Sulphate              | 3                                 |
| Potassium Sulphate              | 2                                 |
| Trace Element Mix               | 1                                 |
| Fertilizer NPK (16.4.14)        | 4                                 |
| Lime                            | 20                                |
| Total                           | 82                                |

11    **Biofilter Vegetation**

12    Table S.3: Biofilter vegetation Details

| Name                             | Short description                                                                                                                                                                     | Plant during experimental period                                                     | Extent of roots after 2 years of operation                                            |
|----------------------------------|---------------------------------------------------------------------------------------------------------------------------------------------------------------------------------------|--------------------------------------------------------------------------------------|---------------------------------------------------------------------------------------|
| <i>Carex appressa</i>            | <p>Also known as tall sedge.</p> <p>The most commonly used and recommended biofilter plant species in Australia.</p> <p>Consist of an extensive root system with very fine roots.</p> |    |    |
| <i>Leptospermum continentale</i> | <p>A small shrub species known as tea tree.</p> <p>Consist of an extensive root system with very fine roots.</p>                                                                      |   |   |
| Palmetto buffalo grass           | <p>A lawn grass species. Known to have relatively deep roots, however, the root structure is not extensive as the other two species tested.</p>                                       |  |  |

## Tracer Test

The objective of the KCl tracer test was to estimate the submerged zone (SZ) pore volume. SZ pore volume was then used to differentiate old SZ water from the freshly treated stormwater in the biofilter outflow. Furthermore, the porosity of the SZ media was also derived using the tracer test results. It should be noted that the tracer test was conducted only on three replicates of each un-vegetated columns (WS and LS) to avoid any unnecessary impacts on plants and plant-associated microbes due to the introduction of high salt concentration. Nevertheless, SZ of both vegetated and un-vegetated columns had the similar media layers, as such it was assumed that the results from un-vegetated columns apply to vegetated columns.

Dechlorinated tap water (using 0.83 mg/L  $\text{Na}_2\text{S}_2\text{O}_3$ ) was used as the blank solution. Then 0.96 g/L KCL was added to the blank solution to prepare the salt solution with a target electrical conductivity of 2000  $\mu\text{S}/\text{cm}$ . Each column was dosed with 26 L of salt solution, and the total outflow was collected into a series of 500 mL samples. Each outflow sample was analyzed for electrical conductivity. It should be noted that at the end of tracer test, each biofilter column was flushed with another 26 L blank solution, but this flushing caused a significant release of fine particles from the filter media (data not shown). As such, all six un-vegetated columns used for the tracer test were emptied and re-packed. These columns were subjected to accelerated dosing to receive the same amount of water as the rest of the columns to achieve the same level of hydraulic compaction.

The electrical conductivity of each outflow sample ( $C_{\text{out}}$ ) was normalised to the measured electrical conductivity ( $C_{\text{in}}$ ). The results of the tracer test are shown in Figure S1. It was assumed that the old SZ water was fully displaced when a sudden increase in the initial steady normalised outflow concentration ( $C_{\text{out}}/C_{\text{in}}$ ) was observed. The sudden increase in  $C_{\text{out}}/C_{\text{in}}$  was observed when  $C_{\text{out}}/C_{\text{in}}$  reached approximately 0.1, and the cumulative outflow

39 volume reached approximately 10-L. Therefore, the pore volume retained of the SZ was  
 40 estimated to be 10-L, and the porosity was estimated to be 0.5.

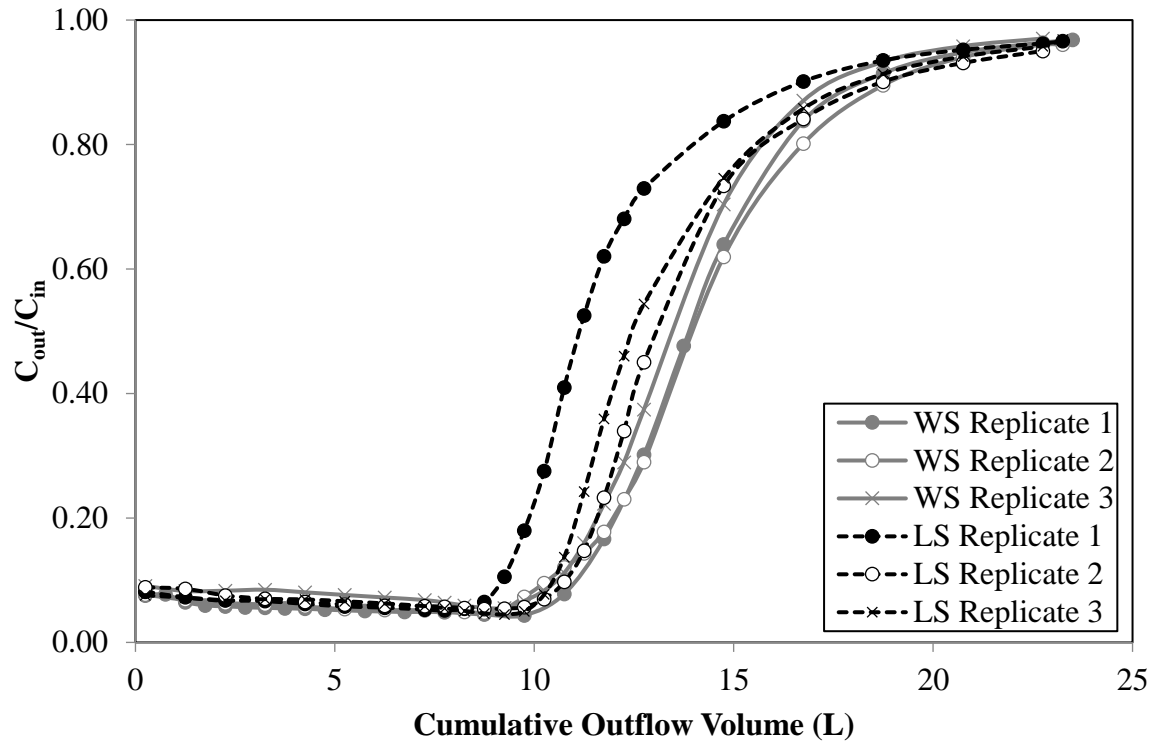

41  
 42 Figure S.2: Change of outflow KCl concentration (normalised to the inflow concentration)  
 43 with cumulative outflow during the tracer test trail in three replicates of WS and LS un-  
 44 vegetated columns.

45 Table S.4: Target and measured semi-synthetic stormwater pollutant concentrations

| Stormwater pollutant   | Unit      | Inflow Concentration                                 |                                                                    |
|------------------------|-----------|------------------------------------------------------|--------------------------------------------------------------------|
|                        |           | Target (Duncan 1999; Taylor et al. 2005; NHMRC 2009) | Measured<br>Geometric mean ( <i>Geometric standard deviation</i> ) |
| <i>E. coli</i>         | MPN/100mL | 5.9×10 <sup>4</sup>                                  | 2.8×10 <sup>4</sup> (4.16)                                         |
| Total suspended solids | mg/L      | 100                                                  | 86 (1.44)                                                          |
| Total phosphorus       | mg/L      | 0.35                                                 | 0.42 (1.18)                                                        |
| Total nitrogen         | mg/L      | 2.2                                                  | 2.92 (1.17)                                                        |
| Cadmium                | mg/L      | 0.0045                                               | 0.0081 (1.40)                                                      |
| Chromium               | mg/L      | 0.025                                                | 0.054 (1.58)                                                       |
| Copper                 | mg/L      | 0.05                                                 | 0.08 (1.36)                                                        |
| Lead                   | mg/L      | 0.14                                                 | 0.27 (1.47)                                                        |
| Manganese              | mg/L      | 0.23                                                 | 0.19 (1.11)                                                        |
| Nickel                 | mg/L      | 0.031                                                | 0.05 (1.30)                                                        |
| Zinc                   | mg/L      | 0.25                                                 | 0.26 (1.18)                                                        |

46 MPN – Most Probable Number; Total suspended solids, total nitrogen, total phosphorus and  
 47 heavy metal concentrations were measured using standard methods ((APHA/AWWA/WPCF  
 48 2005; Hsomi and Sudo 1986) and ICP-MS (for metals))

49 Table S.5: Performance in each individual sampling round

| Sampling<br>round | Date       | Antecedent<br>dry days | Inflow<br>volume<br>(L) | Inflow <i>E. coli</i><br>concentration<br>(MPN/100<br>mL)* | Outflow <i>E. coli</i> concentration<br>(MPN/100 mL)       |                |               |                |                | Infiltration rate<br>(mm/h)                                |               |               |               |               |
|-------------------|------------|------------------------|-------------------------|------------------------------------------------------------|------------------------------------------------------------|----------------|---------------|----------------|----------------|------------------------------------------------------------|---------------|---------------|---------------|---------------|
|                   |            |                        |                         |                                                            | Geometric mean ( <i>Geometric standard<br/>deviation</i> ) |                |               |                |                | Geometric mean ( <i>Geometric standard<br/>deviation</i> ) |               |               |               |               |
|                   |            |                        |                         |                                                            | WS                                                         | LS             | CA            | LC             | PB             | WS                                                         | LS            | CA            | LC            | PB            |
| 1                 | 2/11/2012  | 2                      | 20                      | 18560                                                      | 994<br>(1.79)                                              | 1317<br>(1.15) | 265<br>(1.32) | 425<br>(1.65)  | 522<br>(1.55)  | 298<br>(1.12)                                              | 187<br>(1.30) | 262<br>(1.09) | 272<br>(1.05) | 292<br>(1.11) |
| 2                 | 16/11/2012 | 3                      | 20                      | 9160                                                       | 538<br>(1.56)                                              | 867<br>(1.24)  | 263<br>(1.25) | 355<br>(1.69)  | 279<br>(1.70)  | 333<br>(1.03)                                              | 235<br>(1.22) | 286<br>(1.06) | 295<br>(1.07) | 311<br>(1.08) |
| 3 <sup>(a)</sup>  | 27/11/2012 | 4                      | <b>40</b>               | 23010                                                      | 626<br>(1.87)                                              | 1621<br>(1.16) | 630<br>(1.28) | 1108<br>(1.51) | 1045<br>(1.24) | 337<br>(1.05)                                              | 205<br>(1.12) | 291<br>(1.05) | 282<br>(1.14) | 318<br>(1.08) |
| 4                 | 4/12/2012  | 4                      | 20                      | 25900                                                      | 549<br>(1.31)                                              | 1320<br>(1.32) | 442<br>(1.27) | 634<br>(1.91)  | 747<br>(1.58)  | 259<br>(1.12)                                              | 168<br>(1.08) | 250<br>(1.06) | 210<br>(1.51) | 252<br>(1.09) |
| 5                 | 11/12/2012 | 7                      | 20                      | 20420                                                      | 380<br>(1.53)                                              | 837<br>(1.13)  | 258<br>(1.28) | 413<br>(1.37)  | 458<br>(1.42)  | 262<br>(1.26)                                              | 185<br>(1.07) | 256<br>(1.06) | 253<br>(1.31) | 274<br>(1.22) |
| 6 <sup>(d)</sup>  | 29/01/2013 | 3                      | 20                      | 132420                                                     | 3155                                                       | 1283           | 383           | 1872           | 3027           | 91                                                         | 123           | 53            | 146           | 126           |

|                      |            |    |    |        |        |        |        |        |         |        |        |        |        |        |
|----------------------|------------|----|----|--------|--------|--------|--------|--------|---------|--------|--------|--------|--------|--------|
|                      |            |    |    |        | (1.52) | (2.18) | (3.99) | (1.74) | (.145)  | (2.00) | (1.48) | (1.48) | (1.33) | (1.19) |
| 7 <sup>(b, d)</sup>  | 12/02/2012 | 13 | 20 | 104090 | 1682   | 2569   | 3058   | 4724   | 2696    | 337    | 209    | 200    | 253    | 228    |
|                      |            |    |    |        | (1.80) | (1.44) | (1.22) | (2.08) | (1.54)  | (1.07) | (1.16) | (1.21) | (1.01) | (1.26) |
| 8 <sup>(a)</sup>     | 19/02/2013 | 4  | 40 | 22030  | 1365   | 1237   | 840    | 1673   | 986     | 251    | 182    | 133    | 214    | 180    |
|                      |            |    |    |        | (1.21) | (1.29) | (1.30) | (1.29) | (1.22)  | (1.10) | (1.15) | (1.30) | (1.14) | (1.19) |
| 9                    | 26/02/2013 | 2  | 20 | 62680  | 2306   | 2040   | 1199   | 2447   | 2606    | 212    | 179    | 80     | 134    | 147    |
|                      |            |    |    |        | (1.40) | (1.25) | (1.49) | (1.13) | (1.540) | (1.11) | (1.06) | (1.49) | (1.29) | (1.26) |
| 10 <sup>(d)</sup>    | 25/03/2013 | 29 | 20 | 26850  | 199    | 155    | 10279  | 17131  | 1247    | 314    | 173    | 243    | 235    | 346    |
|                      |            |    |    |        | (1.51) | (1.41) | (3.67) | (1.25) | (1.15)  | (1.15) | (1.23) | (1.09) | (1.13) | (1.10) |
| 11 <sup>(d)</sup>    | 12/04/2013 | 3  | 20 | 21980  | 1115   | 892    | 883    | 1043   | 1945    | 206    | 167    | 79     | 107    | 217    |
|                      |            |    |    |        | (1.33) | (1.18) | (1.60) | (1.20) | (1.21)  | (1.42) | (1.11) | (1.34) | (2.04) | (1.26) |
| 12 <sup>(b, d)</sup> | 24/05/2013 | 42 | 20 | 17930  | 1029   | 734    | 6808   | 5325   | 1789    | 237    | 114    | 205    | 178    | 177    |
|                      |            |    |    |        | (1.34) | (1.33) | (1.26) | (1.48) | (1.49)  | (1.36) | (1.18) | (1.03) | (1.38) | (1.60) |
| 13 <sup>(a)</sup>    | 4/06/2013  | 3  | 40 | 18030  | 1508   | 628    | 419    | 378    | 1189    | 193    | 130    | 63     | 92     | 178    |
|                      |            |    |    |        | (1.24) | (1.20) | (1.47) | (2.65) | (1.39)  | (1.15) | (1.07) | (1.40) | (2.06) | (1.16) |
| 14 <sup>(c)</sup>    | 18/06/2013 | 4  | 20 | 12160  | 302    | 77     | 60     | 68     | 620     | 60     | 52     | 26     | 32     | 54     |
|                      |            |    |    |        | (1.70) | (2.98) | (1.55) | (5.22) | (1.19)  | (1.64) | (1.63) | (1.26) | (2.15) | (2.47) |



|                      |            |   |    |       |        |        |        |        |        |        |        |        |        |        |
|----------------------|------------|---|----|-------|--------|--------|--------|--------|--------|--------|--------|--------|--------|--------|
| 15 <sup>(c, e)</sup> | 19/06/2013 | 1 | 20 | 190   | 194    | 65     | 52     | 38     | 500    | 47     | 51     | 23     | 27     | 37     |
|                      |            |   |    |       | (1.72) | (2.31) | (1.99) | (2.30) | (1.04) | (1.65) | (1.56) | (1.32) | (1.94) | (2.29) |
| 16 <sup>(c)</sup>    | 28/06/2013 | 3 | 20 | 12160 | 210    | 36     | 30     | 28     | 531    | 56     | 42     | 17     | 24     | 69     |
|                      |            |   |    |       | (2.13) | (3.27) | (2.55) | (4.83) | (1.32) | (1.90) | (1.70) | (1.10) | (2.05) | (1.50) |

Notes: \*: Inflow *E. coli* concentration is rounded for significant digits; (a): High inflow volume events simulating 1 in 3 months ARI events. Three replicates each from WS and LC configurations were tested for other indicators in addition to *E. coli*; (b): dry weather events; (c); Outflow valves were restricted in three replicates from each configuration to one target infiltration rate (d): Discrete outflow samples were collected for two replicates in WS, CA, LC and PB configurations; (e): No raw sewage was added to inflow mix.

## References

- APHA/AWWA/WPCF. 2005. *Standard Methods for the Examination of Water and Wastewater*. 21st ed. Washington, USA: American Public Health Association/ American Water Works Association/Water Pollution Control Federation.
- Bratieres, K., T. Fletcher, A. Deletic, N. Somes, and T. Woodcock. 2010. 'Hydraulic and Pollutant Treatment Performance of Sand Based Biofilters'. presented at the NOVATECH, Lyon, France, July.
- Duncan, H. P. 1999. 'Urban Stormwater Quality: A Statistical Overview'. 99/3. Melbourne, Australia: Cooperative Research Centre for Catchment Hydrology.
- Hsomi, M., and R. Sudo. 1986. 'Simultaneous Determination of Total Nitrogen and Total Phosphorus in Freshwater Samples Using Persulphate Digestion'. *International Journal of Environmental Studies* 27: 267–75.
- NHMRC. 2009. 'Australian Guidelines for Water Recycling (Phase 2): Stormwater Harvesting and Reuse'. Canberra: Natural Resource Management Ministerial Council, Environment Protection and Heritage Council, National Health and Medical Research Council.

66 Taylor, G. D., T. D. Fletcher, T. H. F. Wong, P. F. Breen, and H. P. Duncan. 2005. 'Nitrogen Composition in Urban Runoff - Implications for  
67 Stormwater Management'. *Water Research* 39: 1982–89. <https://doi.org/10.1016/j.watres.2005.03.022>.  
68
